# Supplementary material for: Towards Uncovering the Role of Incomplete Penetrance in Maculopathies through Sequencing of 105 Disease-Associated Genes
Source: MDPI journal article supplement (doi:10.3390/biom14030367), 2024-03-19
Supplement: s1 [file s1]

**Supplementary Table S1: Oligonucleotides used throughout the study.**

A. Primers with gateway cloning tags for *ABCA4* intron 49 minigene creation.

| Minigene | Variant                 | Sequence (5'-3')                                    |
|----------|-------------------------|-----------------------------------------------------|
| BA39     | ABCA4_c.6817-679C>G_Fwd | GGGGACAAGTTTGTACAAAAAAGCAGGCTTCCATTAAGCAGAGGGAGGCAC |
|          | ABCA4_c.6817-679C>G_Rev | GGGGACCACTTTGTACAAGAAAGCTGGGTGCTGAGGGCACTGTGATTCTG  |

B. Site-directed mutagenesis primers used to introduce variants in wild-type entry clones for *ABCA4* midigene assays.

| WT fragment | DNA variant_primer orientation | Mutagenesis primer sequences (5'-3')          |
|-------------|--------------------------------|-----------------------------------------------|
| BA7         | ABCA4_c.1451A>G_mut_Fwd        | CCCGAGGGCCCCTGTAGAGGAAGTTTAGGATGG             |
|             | ABCA4_c.1451A>G_mut_Rev        | CCATCCTAAACTTCTCTACAGGGGCCCTCGGG              |
| BA16        | ABCA4_c.3329-124G>T_Fwd        | AGGAGTTAACTAAAAAAAAAACACAAGGGAAGTAATTCAGCAGCA |
|             | ABCA4_c.3329-124G>T_Rev        | TGCTGCTGAATTAGTCCCTTGTTTCTTTTCTTTAGTTAACTCCT  |

C. Primers used for reverse transcription-PCR analysis for *ABCA4* midigene assays.

| BA_ID              | Primer sequences (5'-3') | Genomic position (hg19) |
|--------------------|--------------------------|-------------------------|
| RHO_exon3_forward  | CGGAGGTCAACAACGAGTCT     | chr3:129251150          |
| ABCA4_exon9        | TTTGCTGATGGGAAAAATCC     | chr1:94544941           |
| RHO_exon5_forward  | ATCTGCTGCGGCAAGAAC       | chr3:129252475          |
| RHO_exon5_reverse  | AGGTGTAGGGGATGGGAGAC     | chr3:129252614          |
| ACTB_exon3_forward | ACTGGGACGACATGGAGAAG     | chr7:5568922            |
| ACTB_exon4_reverse | TCTCAGCTGTGGTGGTGAAG     | chr7:5568099            |

D. Primers used for *ROM1* variant phasing.

| BA_ID             | Primer sequences (5'-3') | Genomic position (hg19) |
|-------------------|--------------------------|-------------------------|
| ROM1_Ex1_forward  | GTGGCGTCATCCTCCTCTG      | chr11: 62380848         |
| ROM1_Int2_reverse | GCAAGGGGAAAGAGTCAGGG     | chr11:62382062          |
