# Supplementary figures and images for: Towards Uncovering the Role of Incomplete Penetrance in Maculopathies through Sequencing of 105 Disease-Associated Genes
Source: MDPI journal article supplement (doi:10.3390/biom14030367), 2024-03-19

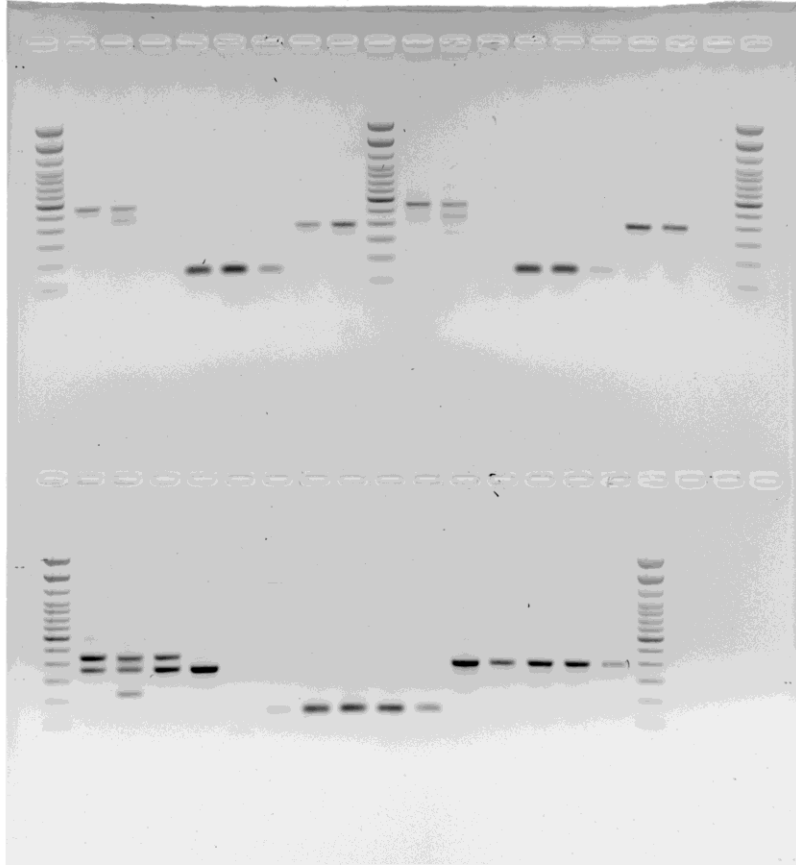

RT-PCR *ABCA4* c.1451A>G original gel image

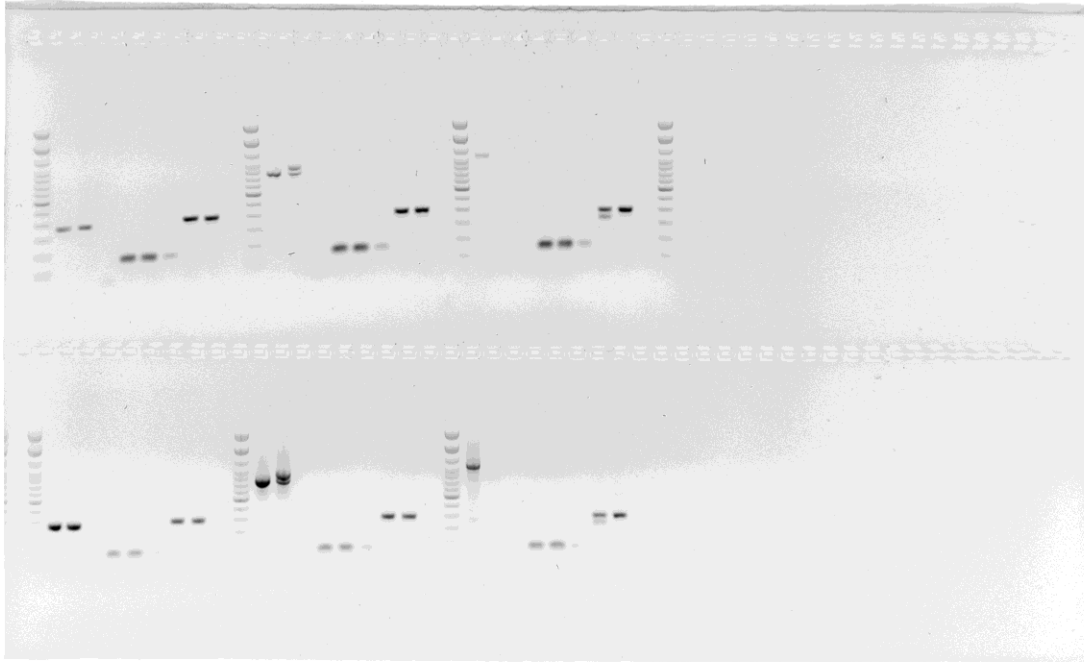

RT-PCR *ABCA4* c.6817-679C>G and c.3329-124G>T original gel image

Supplement: s1 [file s1]
